# Supplementary material for: Regulation Systems of Bacteria such as Escherichia coli in Response to Nutrient Limitation and Environmental Stresses
Source: PubMed Central journal article supplement (PMC4018673; doi:10.3390/metabo4010001), 2013-12-30
Supplement: metabolites-04-00001-s001.pdf [file metabolites-04-00001-s001.pdf]

## Supplementary File

**Table S1.** Effect of global regulators on the metabolic pathway gene expressions.

| Global regulator | Metabolic pathway genes                                                                                                                                                                                     |
|------------------|-------------------------------------------------------------------------------------------------------------------------------------------------------------------------------------------------------------|
| Cra              | + : <i>aceBAK, cydB, fbp, icdA, pckA, pgk, ppsA</i><br>- : <i>acnB, adhE, eda, edd, pfkA, pykF, zwf</i>                                                                                                     |
| Crp (cAMP-Crp)   | + : <i>aceEF, acnAB, acs, focA, fumA, gltA, lpdA, malT, manXYZ, mdh, mlc, pckA, pdhR, pflB, pgk, ptsG, sdhCDAB, sucABCD, ugpABCEQ,</i><br>- : <i>cyaA, lpdA, rpoS</i>                                       |
| ArcA/B           | + : <i>cydAB, focA, pflB</i><br>- : <i>aceBAK, aceEF, acnAB, cyoABCDE, fumAC, gltA, icdA, lpdA, mdh, nuoABCDEFGHijklmN, pdhR, sdhCDAB, soda, sucABCD</i>                                                    |
| Mlc              | - : <i>crr, manXYZ, malT, ptsG, ptsHI</i>                                                                                                                                                                   |
| PdhR             | - : <i>aceEF, lpdA</i>                                                                                                                                                                                      |
| CsrA             | + : <i>eno, pfkA, pgi, pykF, tpiA</i><br>- : <i>fbp, glgC, glgA, glgB, pgm, ppsA, pckA,</i>                                                                                                                 |
| Fur              | + :<br>- : <i>entABCDEF, talB, soda</i>                                                                                                                                                                     |
| RpoS             | + : <i>acnA, acs, ada, appAR, appB, argH, aroM, dps, bolA, fbaB, fumC, gabP, gadA, gadB, katE, katG, ldcC, narY, nuv, pfkB, osmE, osmY, poxB, sodC, talA, tktB, ugpE, C, xthA, yhgY,</i><br>- : <i>ompF</i> |
| SoxR/S           | + : <i>acnA, cat, fumC, fur, soda, sox, zwf</i><br>- :                                                                                                                                                      |
| OxyR             | + : <i>ahpC, ahpF, katG</i><br>- :                                                                                                                                                                          |
| PhoR/B           | + : <i>phoBR, phoA-psiF, asr, pstSCAB-phoU</i><br>- : <i>phoH, phnCHN, ugpA, argP</i>                                                                                                                       |
| Fnr              | + : <i>acs, focA, frdABCD, pflB, yfiD</i><br>- : <i>acnA, cyoABCDE, cydAB, fumA, fnr, icdA, ndh, nuoABCEFGHijklmN, sdhCDAB, sucABC</i>                                                                      |
